# Supplementary material for: One-step synthesis of Co-doped Zn2SnO4–graphene–carbon nanocomposites with improved lithium storage performances
Source: Royal Society of Chemistry journal article supplement (doi:10.1039/c4ta03144j), 2014-10-07
Supplement: c4ta03144j1.pdf [file c4ta03144j1.pdf]

## One-step synthesis of Co-doped Zn<sub>2</sub>SnO<sub>4</sub>-graphene-carbon nanocomposites with improved lithium storage performances

Hui-Yuan Wang, Bang-Yong Wang, Jin-Kui Meng, Jin-Guo Wang\* and Qi-Chuan Jiang

Key Laboratory of Automobile Materials of Ministry of Education & School of Materials Science and Engineering, Nanling Campus, Jilin University, No. 5988 Renmin Street, Changchun 130025, PR China

\* Corresponding authors: Tel/Fax: +86 431 8509 4699

E-mail: wanghuiyuan@jlu.edu.cn; jgwang@jlu.edu.cn

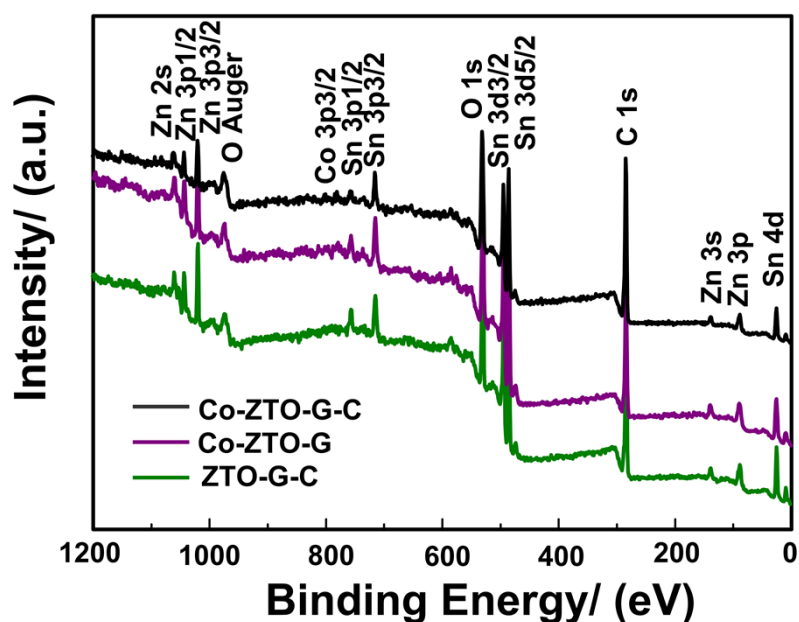

Figure S1. Survey XPS spectra of Co-ZTO-G-C, Co-ZTO-G and ZTO-G-C nanocomposites.

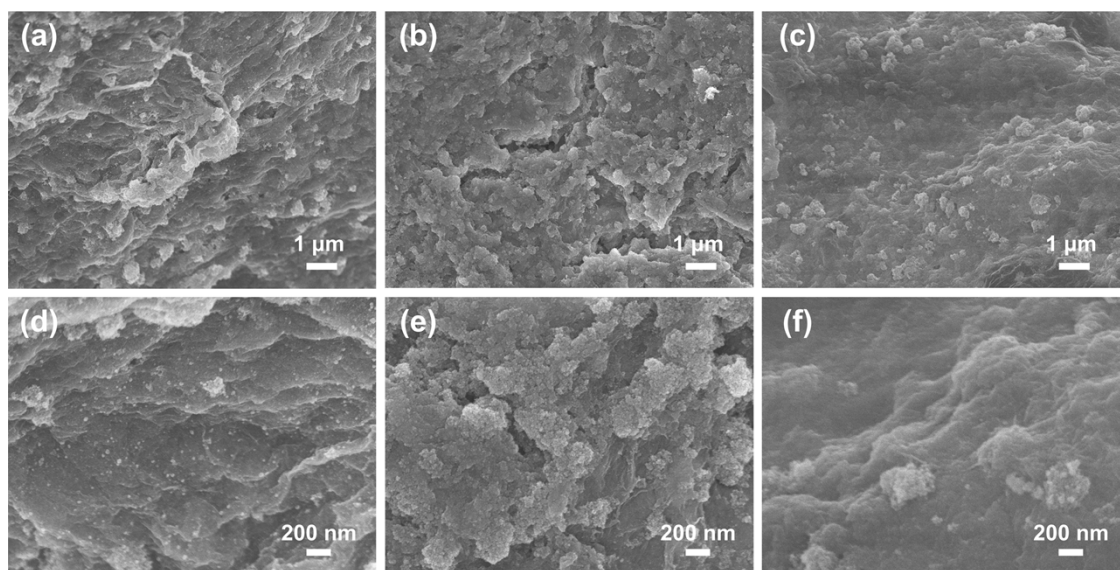

**Figure S2.** FESEM images of (a) and (d) Co-ZTO-G-C, (b) and (e) Co-ZTO-G and (c) and (f) ZTO-G-C nanocomposites.

**Table S1** Atomic and weight ratios of Zn, Sn and Co elements of Co-ZTO-G-C nanocomposites.

| Element | Weight % | Atomic % |
|---------|----------|----------|
| Zn (K)  | 41       | 53       |
| Sn (K)  | 52       | 37       |
| Co (K)  | 7        | 10       |

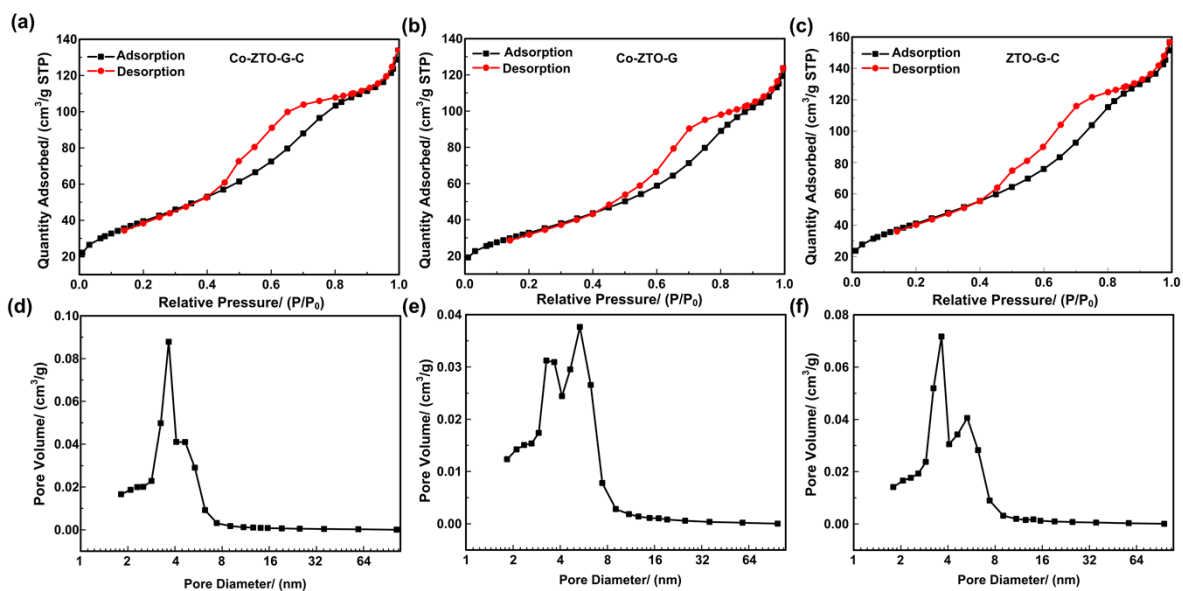

**Figure S3.** N<sub>2</sub> adsorption-desorption isotherm loop and pore-size distribution plots of (a) and (d) Co-ZTO-G-C, (b) and (e) Co-ZTO-G and (c) and (f) ZTO-G-C nanocomposites.

**Table S2** The N<sub>2</sub> adsorption-desorption test results of three nanocomposites.

| Composites | Specific surface area (m <sup>2</sup> /g) | Pore volume (cm <sup>3</sup> /g) | Pore size (nm) |
|------------|-------------------------------------------|----------------------------------|----------------|
| Co-ZTO-G-C | 144.5                                     | 0.188                            | 5.20           |
| Co-ZTO-G   | 118.9                                     | 0.175                            | 5.88           |
| ZTO-G-C    | 150.9                                     | 0.220                            | 5.84           |

**Table S3** Kinetic parameters of Co-ZTO-G-C, Co-ZTO-G and ZTO-G-C electrodes.

| Sample     | $R_e$ ( $\Omega$ ) | $R_{ct}$ ( $\Omega$ ) | $i^0$ ( $\text{mA cm}^{-2}$ ) |
|------------|--------------------|-----------------------|-------------------------------|
| Co-ZTO-G-C | 4.9                | 47.4                  | $3.76 \times 10^{-5}$         |
| Co-ZTO-G   | 6.7                | 112.9                 | $1.58 \times 10^{-5}$         |
| ZTO-G-C    | 5.4                | 72.4                  | $2.46 \times 10^{-5}$         |

Note: The exchange current density  $i^0$  is calculated according to the equation of  $i^0 = RT/nFR_{ct}$ , where R is the gas constant ( $8.314 \text{ J mol}^{-1} \text{ K}^{-1}$ ), T is the absolute temperature (298.15 K), n is the number of transferred electrons, F is the Faraday constant ( $96500 \text{ C mol}^{-1}$ ).
